# Supplementary material for: Identification of Genomic Regions and the Isoamylase Gene for Reduced Grain Chalkiness in Rice
Source: PLoS One. 2015 Mar 19;10(3):e0122013. doi: 10.1371/journal.pone.0122013 (PMC4366167; doi:10.1371/journal.pone.0122013)
Supplement: S1 Dataset — (XLS) [file pone.0122013.s001.xls]

## Sheet: primers
	S1-Table S1. The PCR primers used in this study
Primer		Sequence (5'-3')	Purpose	Reference
ISA1RT	F	GGTCTGAGACAAGCCGTTTC	expression	in this study
ISA1RT	R	TGCAATTCAAGGATGATGGA	expression
ISA2RT	F	TAGAGGTCCTCTTGGAGG	expression	Ohdan et al. 2005
ISA2RT	R	AATCAGCTTCTGAGTCACCG	expression
ISA3RT	F	ACAGCTTGAGACACTGGGTTGAG	expression	Ohdan et al. 2005
ISA3RT	R	GCATCAAGAGGACAACCATCTG	expression
PULRT	F	ACCTTTCTTCCATGCTGG	expression	Ohdan et al. 2005
PULRT	R	CAAAGGTCTGAAAGATGGG	expression
SBEIIb	F	ATGCTAGAGTTTGACCGC	expression	Yamakawa et at .2007
SBEIIb	R	AGTGTGATGGATCCTGCC	expression
GBSSI	F	AACGTGGCTGCTCCTTGAA	expression	Yamakawa et at .2007
GBSSI	R	TTGGCAATAAGCCACACACA	expression
SSIIa	F	GGCCAAGTACCAATGGTGAA	expression	Yamakawa et at .2007
SSIIa	R	GCATGATGCATCTGAAACAAAGC	expression
AGPL2	F	TAGATAGGCCTTGGAATCGCACC	expression	Akihiro et al.2005
AGPL2	R	TAGAGTTCCCATTCCAAAACAAACC	expression
Actin	F	TGCTATGTACGTCGCCATCCAG	expression	Liang et al. 2006
Actin	R	AATGAGTAACCACGCTCCGTCA	expression
DE-2	F	GGCTTGCAATTGAAGTTCTTG	MAS for ISA1	in this study
DE-2	R	TTGAAGGGTGTTTGTGCCTA	MAS for ISA1
RGS1	F	TCCACCTGCAGATTTCTTCC	MAS for gs3	Wang et al. 2011
RGS1	R	GCTGGTCTTGCACATCTCTCT	MAS for gs3
pMCG2	F	GGCTCACCAAACCTTAAACAA	Marker for RNAi	Chu et al. 2006
pMCG2	R	CTGAGCTACACATGCTCAGGTT	Marker for RNAi
pMCG1	F	CTGCTCCACACATGTCCATT	Marker for RNAi	Chu et al. 2006
pMCG1	R	CCCACCATCTTGTGGAGCTA	Marker for RNAi
IS1	F	AAAGAGCTCGGATCCAGATGAAACGAAAGGCGAGA	RNAi vector	in this study
IS1	R	AAAACTAGTGGTACCAAATTGAAGGACCGCACAAC	RNAi vector
