# Supplementary material for: Identification of Genomic Regions and the Isoamylase Gene for Reduced Grain Chalkiness in Rice
Source: PLoS One. 2015 Mar 19;10(3):e0122013. doi: 10.1371/journal.pone.0122013 (PMC4366167; doi:10.1371/journal.pone.0122013)
Supplement: S3 Dataset — (XLS) [file pone.0122013.s003.xls]

## Sheet: Sheet1
S3. The chromosomal location and size of each bin and the QTLs of PGC and DEC from the 143 CSSLs genotyped with SNP array
Bin	Bin order	chr	Bin_start	Bin_end	Bin length (bp)	PGC	PGC	DEC	DEC
						Effect	P value	Effect	P value
N01001p194254	Bin 1	1	194254	400157	205903	0.0159525	0.330987	0.0191395	0.710232
N01002p400157	Bin 2	1	400157	1731505	1331348	0.0114633	0.460545	0.0218697	0.622377
N01003p1731505	Bin 3	1	1731505	1910748	179243	0.00225093	0.896577	-0.0078893	0.885255
N01004p1910748	Bin 4	1	1910748	2100327	189579	0.00376145	0.828211	0.0155287	0.780841
N01005p2100327	Bin 5	1	2100327	2294836	194509	0.0156387	0.354197	0.041924	0.423332
N01006p2294836	Bin 6	1	2294836	3042592	747756	0.0189407	0.246759	0.0342486	0.47229
N01007p3042592	Bin 7	1	3042592	3990055	947463	0.00225093	0.896577	-0.0078893	0.885255
N01008p3990055	Bin 8	1	3990055	5128342	1138287	-0.0189004	0.255575	-0.0788471	0.109626
N01009p5128342	Bin 9	1	5128342	5200223	71881	-0.0189004	0.255575	-0.0788471	0.109626
N01010p5200223	Bin 10	1	5200223	5716166	515943	-0.0260392	0.119679	-0.0806112	0.113201
N01011p5716166	Bin 11	1	5716166	6139727	423561	-0.0380266	0.0218512	-0.0942159	0.0575315
N01012p6139727	Bin 12	1	6139727	7104564	964837	-0.044755	0.00585183	-0.135003	0.00443298
N01013p7104564	Bin 13	1	7104564	8067570	963006	-0.0423168	0.00924071	-0.125001	0.00830469
N01014p8067570	Bin 14	1	8067570	8168584	101014	-0.037843	0.0187904	-0.10596	0.022245
N01015p8168584	Bin 15	1	8168584	8375021	206437	-0.0365059	0.0227674	-0.065287	0.158123
N01016p8375021	Bin 16	1	8375021	8814299	439278	-0.0316974	0.0432008	-0.0227761	0.597179
N01017p8814299	Bin 17	1	8814299	9423355	609056	-0.0350422	0.027341	-0.033138	0.457502
N01018p9423355	Bin 18	1	9423355	9637860	214505	-0.0361065	0.0223657	-0.032413	0.463725
N01019p9637860	Bin 19	1	9637860	10002491	364631	-0.0273098	0.0697738	-0.013583	0.733769
N01020p10002491	Bin 20	1	10002491	10700080	697589	-0.0296251	0.0508963	-0.0322609	0.42453
N01021p10700080	Bin 21	1	10700080	10982452	282372	-0.0174854	0.248298	-0.0185529	0.650541
N01022p10982452	Bin 22	1	10982452	12497535	1515083	-0.00196794	0.896202	0.0184675	0.652081
N01023p12497535	Bin 23	1	12497535	12673808	176273	0.0106557	0.472556	0.0444799	0.258756
N01024p12673808	Bin 24	1	12673808	12732628	58820	0.0168049	0.255498	0.0630056	0.0970187
N01025p12732628	Bin 25	1	12732628	12930877	198249	0.00634073	0.676509	0.0417223	0.306735
N01026p12930877	Bin 26	1	12930877	13250297	319420	-0.000798228	0.960072	0.0254469	0.570295
N01027p13250297	Bin 27	1	13250297	13782528	532231	0.011673	0.451377	0.05055	0.224962
N01028p13782528	Bin 28	1	13782528	14218381	435853	-0.000798228	0.960072	0.0254469	0.570295
N01029p14218381	Bin 29	1	14218381	19502043	5283662	-0.0396026	0.0124525	-0.0698997	0.109056
N01030p19502043	Bin 30	1	19502043	19910901	408858	-0.0261237	0.0911914	-0.0406818	0.321695
N01031p19910901	Bin 31	1	19910901	20250898	339997	-0.0229737	0.146609	-0.045868	0.293454
N01032p20250898	Bin 32	1	20250898	20300216	49318	-0.0406349	0.0129719	-0.0854143	0.0711673
N01033p20300216	Bin 33	1	20300216	20697907	397691	na
N01034p20697907	Bin 34	1	20697907	21121244	423337	0.00447505	0.787169	0.0481125	0.334855
N01035p21121244	Bin 35	1	21121244	22098895	977651	0.00447505	0.787169	0.0481125	0.334855
N01036p22098895	Bin 36	1	22098895	22358269	259374	0.00740585	0.648711	0.0318735	0.51282
N01037p22358269	Bin 37	1	22358269	23179467	821198	0.0112554	0.539512	0.00207397	0.975104
N01038p23179467	Bin 38	1	23179467	28465146	5285679	0.0112554	0.539512	0.00207397	0.975104
N01039p28465146	Bin 39	1	28465146	28814763	349617	-0.0698307	3.559e-05	-0.145594	0.0052269
N01040p28814763	Bin 40	1	28814763	32562416	3747653	-0.0608494	0.000269567	-0.140154	0.00515044
N01041p32562416	Bin 41	1	32562416	33008515	446099	-0.058865	0.000269511	-0.140047	0.00292688
N01042p33008515	Bin 42	1	33008515	35197610	2189095	-0.0268321	0.0890223	-0.0804523	0.0675357
N01043p35197610	Bin 43	1	35197610	36028516	830906	-0.00480597	0.748484	0.00954879	0.821959
N01044p36028516	Bin 44	1	36028516	36276064	247548	0.000847621	0.954117	0.0313348	0.441151
N01045p36276064	Bin 45	1	36276064	36405137	129073	-0.00255117	0.857704	0.00626847	0.868909
N01046p36405137	Bin 46	1	36405137	37467314	1062177	-0.021012	0.128562	-0.038914	0.273894
N01047p37467314	Bin 47	1	37467314	37600294	132980	-0.021012	0.128562	-0.038914	0.273894
N01048p37600294	Bin 48	1	37600294	37800304	200010	-0.0258323	0.0603567	-0.0583111	0.0974196
N01049p37800304	Bin 49	1	37800304	37988257	187953	-0.033569	0.0173177	-0.087185	0.0205386
N01050p37988257	Bin 50	1	37988257	38100492	112235	-0.0321773	0.0193493	-0.0879086	0.0131658
N01051p38100492	Bin 51	1	38100492	38474024	373532	-0.0459202	0.0011035	-0.146807	6.10999e-05
N01052p38474024	Bin 52	1	38474024	38504395	30371	-0.0406672	0.00393805	-0.129737	0.000426912
N01053p38504395	Bin 53	1	38504395	38612207	107812	-0.0480708	0.000647262	-0.139836	0.000149071
N01054p38612207	Bin 54	1	38612207	38674924	62717	-0.0545141	9.13391e-05	-0.153355	1.89386e-05
N01055p38674924	Bin 55	1	38674924	38702412	27488	-0.0484849	0.000464567	-0.131082	0.000211713
N01056p38702412	Bin 56	1	38702412	38803588	101176	-0.0469331	0.000702832	-0.137598	0.000103155
N01057p38803588	Bin 57	1	38803588	39075303	271715	-0.0395072	0.00439059	-0.127455	0.000333522
N01058p39075303	Bin 58	1	39075303	39421385	346082	-0.0230037	0.0993482	-0.0979845	0.00740873
N01059p39421385	Bin 59	1	39421385	39800748	379363	-0.00430508	0.752824	-0.0189826	0.589139
N01060p39800748	Bin 60	1	39800748	39837241	36493	-0.0171881	0.215538	-0.0519738	0.152354
N01061p39837241	Bin 61	1	39837241	40000624	163383	-0.0345072	0.0127414	-0.0910391	0.0108882
N01062p40000624	Bin 62	1	40000624	40151312	150688	-0.0380666	0.00679858	-0.098467	0.00739357
N01063p40151312	Bin 63	1	40151312	40322365	171053	-0.0252771	0.0744337	-0.125295	0.00085081
N01064p40322365	Bin 64	1	40322365	40494525	172160	-0.0216408	0.139953	-0.120213	0.00337489
N01065p40494525	Bin 65	1	40494525	40597727	103202	-0.0181263	0.217073	-0.103956	0.0113004
N01066p40597727	Bin 66	1	40597727	40611781	14054	-0.0214049	0.138574	-0.111445	0.00446343
N01067p40611781	Bin 67	1	40611781	40832098	220317	-0.0145613	0.31837	-0.0896052	0.0259112
N01068p40832098	Bin 68	1	40832098	40901093	68995	-0.00970376	0.502344	-0.063117	0.10919
N01069p40901093	Bin 69	1	40901093	41602396	701303	-0.00595968	0.684258	-0.0354374	0.375292
N01070p41602396	Bin 70	1	41602396	41749915	147519	-0.00837302	0.573164	-0.0320225	0.435526
N01071p41749915	Bin 71	1	41749915	41841790	91875	0.000824009	0.955963	0.0492116	0.241372
N01072p41841790	Bin 72	1	41841790	41883027	41237	-0.00231251	0.877683	0.0379635	0.373206
N01073p41883027	Bin 73	1	41883027	42294069	411042	-0.00856327	0.567984	0.0199548	0.641075
N01074p42294069	Bin 74	1	42294069	43270923	976854	-0.0070809	0.672734	-0.000596022	0.991207
N02075p51624	Bin 75	2	51624	589810	538186	0.0438514	0.00620352	0.0559066	0.237124
N02076p589810	Bin 76	2	589810	800465	210655	0.0426825	0.00813167	0.0694306	0.149137
N02077p800465	Bin 77	2	800465	900582	100117	0.0366498	0.019025	0.035205	0.430835
N02078p900582	Bin 78	2	900582	1073480	172898	0.0307614	0.0497407	0.0216127	0.62696
N02079p1073480	Bin 79	2	1073480	1487009	413529	0.02842	0.0792379	0.0639021	0.182393
N02080p1487009	Bin 80	2	1487009	1660713	173704	0.02842	0.0792379	0.0639021	0.182393
N02081p1660713	Bin 81	2	1660713	2008861	348148	-0.00785443	0.622019	-0.0326131	0.476683
N02082p2008861	Bin 82	2	2008861	2110323	101462	-0.0120763	0.43385	-0.0834322	0.0466336
N02083p2110323	Bin 83	2	2110323	2984693	874370	-0.0264341	0.0944525	-0.115763	0.0102401
N02084p2984693	Bin 84	2	2984693	3481536	496843	-0.0121714	0.434872	-0.0829109	0.0568251
N02085p3481536	Bin 85	2	3481536	3657514	175978	-0.0277412	0.0863877	-0.0842432	0.0866429
N02086p3657514	Bin 86	2	3657514	4242149	584635	-0.0120938	0.46206	-0.0307559	0.540162
N02087p4242149	Bin 87	2	4242149	4408377	166228	-0.0126356	0.429406	-0.0321847	0.484348
N02088p4408377	Bin 88	2	4408377	5300146	891769	-0.0141534	0.376837	-0.020731	0.654083
N02089p5300146	Bin 89	2	5300146	5569508	269362	0.0169693	0.297248	0.0788022	0.106254
N02090p5569508	Bin 90	2	5569508	5892227	322719	0.013147	0.413661	0.0611202	0.190667
N02091p5892227	Bin 91	2	5892227	6244534	352307	0.0196827	0.205672	0.0561499	0.183245
N02092p6244534	Bin 92	2	6244534	6401749	157215	0.0331095	0.0342813	0.0692013	0.11268
N02093p6401749	Bin 93	2	6401749	6700450	298701	0.0178809	0.245829	0.047038	0.252724
N02094p6700450	Bin 94	2	6700450	6852655	152205	0.0111796	0.455442	0.00553116	0.884982
N02095p6852655	Bin 95	2	6852655	7001472	148817	0.00298279	0.844807	-0.00223158	0.956223
N02096p7001472	Bin 96	2	7001472	7777806	776334	-0.0029918	0.846282	-0.0220265	0.600753
N02097p7777806	Bin 97	2	7777806	8283650	505844	0.0141179	0.360559	0.00101243	0.980976
N02098p8283650	Bin 98	2	8283650	8601107	317457	0.013361	0.39606	0.028294	0.533418
N02099p8601107	Bin 99	2	8601107	10217785	1616678	0.0181193	0.260977	0.0450761	0.356355
N02100p10217785	Bin 100	2	10217785	11130699	912914	0.0266321	0.105748	0.0791494	0.117338
N02101p11130699	Bin 101	2	11130699	11600178	469479	0.0263196	0.111846	0.0305987	0.562723
N02102p11600178	Bin 102	2	11600178	12091362	491184	0.0302595	0.0574472	0.0641597	0.193082
N02103p12091362	Bin 103	2	12091362	16068540	3977178	0.0336171	0.0146843	0.060769	0.0717318
N02104p16068540	Bin 104	2	16068540	17261161	1192621	0.0339985	0.0281039	0.062566	0.178333
N02105p17261161	Bin 105	2	17261161	17531143	269982	0.0291425	0.0776392	0.0718114	0.175167
N02106p17531143	Bin 106	2	17531143	20300258	2769115	0.0339985	0.0281039	0.062566	0.178333
N02107p20300258	Bin 107	2	20300258	21295457	995199	0.0359658	0.0144408	0.0738263	0.0698076
N02108p21295457	Bin 108	2	21295457	22113421	817964	0.0436474	0.00269785	0.0926265	0.0186974
N02109p22113421	Bin 109	2	22113421	23077334	963913	0.0418813	0.00242767	0.0905818	0.0072954
N02110p23077334	Bin 110	2	23077334	23893802	816468	0.0413048	0.00278521	0.0701655	0.0405338
N02111p23893802	Bin 111	2	23893802	24502020	608218	0.0279194	0.0520689	0.045295	0.216963
N02112p24502020	Bin 112	2	24502020	24882249	380229	0.0241017	0.0936551	0.0588153	0.109645
N02113p24882249	Bin 113	2	24882249	26260424	1378175	0.0164924	0.270166	0.00451582	0.914112
N02114p26260424	Bin 114	2	26260424	26602517	342093	0.0160751	0.271182	0.0127844	0.745519
N02115p26602517	Bin 115	2	26602517	27528734	926217	0.0140949	0.338989	0.00499112	0.899511
N02116p27528734	Bin 116	2	27528734	27900121	371387	0.00938849	0.529675	0.021052	0.601031
N02117p27900121	Bin 117	2	27900121	29584046	1683925	0.000521624	0.97267	0.000643541	0.987902
N02118p29584046	Bin 118	2	29584046	29900460	316414	-0.0136468	0.369018	-0.0565201	0.172583
N02119p29900460	Bin 119	2	29900460	30600314	699854	-0.010128	0.501755	-0.0189654	0.643243
N02120p30600314	Bin 120	2	30600314	30910348	310034	-0.00214809	0.893854	-0.0106118	0.829436
N02121p30910348	Bin 121	2	30910348	32377426	1467078	-0.010128	0.501755	-0.0189654	0.643243
N02122p32377426	Bin 122	2	32377426	32501840	124414	-0.0099746	0.505333	-0.0129788	0.749943
N02123p32501840	Bin 123	2	32501840	33100520	598680	-0.0060675	0.679236	-0.0345841	0.380144
N02124p33100520	Bin 124	2	33100520	33501902	401382	-0.0081651	0.582694	-0.0425686	0.286444
N02125p33501902	Bin 125	2	33501902	33577323	75421	-0.00994669	0.517332	-0.0558585	0.196463
N02126p33577323	Bin 126	2	33577323	34000058	422735	-0.015953	0.31075	-0.053569	0.248345
N02127p34000058	Bin 127	2	34000058	34025732	25674	0.00424834	0.7823	0.029693	0.499448
N02128p34025732	Bin 128	2	34025732	34160714	134982	-0.0273481	0.0872887	-0.0520408	0.270111
N02129p34160714	Bin 129	2	34160714	34200287	39573	-0.0272854	0.0868405	-0.0447465	0.343247
N02130p34200287	Bin 130	2	34200287	34366232	165945	-0.0272854	0.0868405	-0.0447465	0.343247
N02131p34366232	Bin 131	2	34366232	35937250	1571018	-0.0478738	0.00600479	-0.117453	0.0393966
N03132p216406	Bin 132	3	216406	558019	341613	0.0324972	0.0404696	0.0484775	0.294306
N03133p558019	Bin 133	3	558019	2141530	1583511	0.0255571	0.116489	0.0152638	0.756832
N03134p2141530	Bin 134	3	2141530	2401474	259944	-0.00534452	0.764608	-0.0531192	0.381409
N03135p2401474	Bin 135	3	2401474	3884831	1483357	-0.00534452	0.764608	-0.0531192	0.381409
N03136p3884831	Bin 136	3	3884831	4433662	548831	0.00256608	0.879233	0.0496174	0.339208
N03137p4433662	Bin 137	3	4433662	4700252	266590	-0.000657615	0.969093	0.0188452	0.71994
N03138p4700252	Bin 138	3	4700252	5900936	1200684	0.00531381	0.757816	0.0525833	0.332842
N03139p5900936	Bin 139	3	5900936	6204167	303231	0.00531381	0.757816	0.0525833	0.332842
N03140p6204167	Bin 140	3	6204167	6957093	752926	0.00857163	0.621835	0.0992973	0.0752912
N03141p6957093	Bin 141	3	6957093	7465394	508301	0.00675769	0.70465	0.087258	0.150654
N03142p7465394	Bin 142	3	7465394	7970416	505022	0.00675769	0.70465	0.087258	0.150654
N03143p7970416	Bin 143	3	7970416	9341420	1371004	-0.00547502	0.76419	-0.0100418	0.877789
N03144p9341420	Bin 144	3	9341420	10341775	1000355	-0.0105614	0.543842	-0.0238531	0.68542
N03145p10341775	Bin 145	3	10341775	10814365	472590	-0.0129275	0.43804	-0.0587414	0.269582
N03146p10814365	Bin 146	3	10814365	11900189	1085824	-0.0167592	0.318552	-0.0220171	0.676465
N03147p11900189	Bin 147	3	11900189	13226047	1325858	-0.0111539	0.507365	0.0250361	0.636445
N03148p13226047	Bin 148	3	13226047	14455981	1229934	0.00429632	0.776286	0.00423659	0.918036
N03149p14455981	Bin 149	3	14455981	14585079	129098	0.00636574	0.677053	0.0406313	0.337935
N03150p14585079	Bin 150	3	14585079	14821233	236154	0.00636574	0.677053	0.0406313	0.337935
N03151p14821233	Bin 151	3	14821233	14929968	108735	0.0124435	0.406381	0.0224913	0.582729
N03152p14929968	Bin 152	3	14929968	15922493	992525	0.0124435	0.406381	0.0224913	0.582729
N03153p15922493	Bin 153	3	15922493	16010606	88113	0.0241089	0.103464	0.0456738	0.26831
N03154p16010606	Bin 154	3	16010606	16878666	868060	0.0241089	0.103464	0.0456738	0.26831
N03155p16878666	Bin 155	3	16878666	16963341	84675	0.0285251	0.0525762	0.0590199	0.137643
N03156p16963341	Bin 156	3	16963341	21704172	4740831	0.0285251	0.0525762	0.0590199	0.137643
N03157p21704172	Bin 157	3	21704172	22100657	396485	0.0310629	0.032469	0.0551578	0.145001
N03158p22100657	Bin 158	3	22100657	22484577	383920	0.0306201	0.0341072	0.0309691	0.410237
N03159p22484577	Bin 159	3	22484577	22982431	497854	0.0374487	0.0109191	0.0473895	0.224642
N03160p22982431	Bin 160	3	22982431	24162432	1180001	0.0411024	0.00545886	0.0292395	0.460953
N03161p24162432	Bin 161	3	24162432	24720040	557608	0.0431732	0.00378629	0.0432103	0.282459
N03162p24720040	Bin 162	3	24720040	25111321	391281	0.0429882	0.00508099	0.0537454	0.219036
N03163p25111321	Bin 163	3	25111321	25330339	219018	0.0404597	0.0105467	0.0409086	0.387539
N03164p25330339	Bin 164	3	25330339	26479787	1149448	0.0227112	0.144495	-0.00401826	0.927865
N03165p26479787	Bin 165	3	26479787	26505377	25590	0.0224898	0.142065	0.00847163	0.844532
N03166p26505377	Bin 166	3	26505377	26804740	299363	0.0152393	0.319934	0.000303349	0.994348
N03167p26804740	Bin 167	3	26804740	27319223	514483	0.057303	0.000229267	0.0763944	0.0841693
N03168p27319223	Bin 168	3	27319223	27484832	165609	0.0575721	0.000230091	0.0767216	0.0890998
N03169p27484832	Bin 169	3	27484832	27689539	204707	0.0466156	0.00257389	0.0598796	0.173064
N03170p27689539	Bin 170	3	27689539	28107342	417803	0.0385115	0.0113558	0.0548754	0.191049
N03171p28107342	Bin 171	3	28107342	28657938	550596	0.045367	0.00278332	0.0527911	0.206454
N03172p28657938	Bin 172	3	28657938	28971198	313260	0.0412213	0.00706906	0.044189	0.307465
N03173p28971198	Bin 173	3	28971198	29099650	128452	0.01835	0.207994	-0.0265737	0.489593
N03174p29099650	Bin 174	3	29099650	29443202	343552	0.0217837	0.127133	-0.012945	0.719193
N03175p29443202	Bin 175	3	29443202	30097709	654507	0.0211204	0.138116	-0.00216216	0.951929
N03176p30097709	Bin 176	3	30097709	30401254	303545	0.0105642	0.472357	-0.0232362	0.544546
N03177p30401254	Bin 177	3	30401254	30453550	52296	0.00893159	0.543464	-0.0203212	0.592873
N03178p30453550	Bin 178	3	30453550	30690890	237340	0.0129859	0.373072	0.0073297	0.844359
N03179p30690890	Bin 179	3	30690890	30840903	150013	-0.00321628	0.827366	-0.0139674	0.722754
N03180p30840903	Bin 180	3	30840903	31158190	317287	0.00174249	0.904479	0.00616384	0.868647
N03181p31158190	Bin 181	3	31158190	31211835	53645	-0.00965787	0.487484	0.00760951	0.825392
N03182p31211835	Bin 182	3	31211835	31759927	548092	-0.0106971	0.444848	0.00483436	0.89001
N03183p31759927	Bin 183	3	31759927	31980774	220847	-0.00818025	0.565241	0.0181328	0.616916
N03184p31980774	Bin 184	3	31980774	32180761	199987	-0.0124497	0.382845	-0.00454196	0.900822
N03185p32180761	Bin 185	3	32180761	32500142	319381	-0.0152543	0.277355	-0.0192284	0.58553
N03186p32500142	Bin 186	3	32500142	32577081	76939	-0.0153163	0.283041	-0.0252266	0.493138
N03187p32577081	Bin 187	3	32577081	33231091	654010	-0.0153163	0.283041	-0.0252266	0.493138
N03188p33231091	Bin 188	3	33231091	33258668	27577	-0.0187722	0.192692	-0.0145163	0.702552
N03189p33258668	Bin 189	3	33258668	33447130	188462	-0.0182292	0.191909	-0.00540493	0.877496
N03190p33447130	Bin 190	3	33447130	33798080	350950	-0.0275693	0.048796	-0.0447496	0.210639
N03191p33798080	Bin 191	3	33798080	33900141	102061	-0.0232298	0.105961	-0.0252617	0.503975
N03192p33900141	Bin 192	3	33900141	34501498	601357	-0.0232298	0.105961	-0.0252617	0.503975
N03193p34501498	Bin 193	3	34501498	34966710	465212	-0.00285692	0.853773	0.048443	0.268889
N03194p34966710	Bin 194	3	34966710	35656292	689582	-0.00373363	0.807595	0.0541238	0.200371
N03195p35656292	Bin 195	3	35656292	35972108	315816	-0.0249791	0.115897	-0.0187238	0.684627
N03196p35972108	Bin 196	3	35972108	36004055	31947	-0.0290305	0.0693675	-0.024791	0.593265
N03197p36004055	Bin 197	3	36004055	36216548	212493	-0.0299605	0.0597259	-0.0180029	0.693514
N03198p36216548	Bin 198	3	36216548	36413819	197271	-0.0102158	0.514597	0.0394131	0.375996
N04199p203512	Bin 199	4	203512	371356	167844	0.0254903	0.101286	-0.00230483	0.958194
N04200p371356	Bin 200	4	371356	586600	215244	0.033774	0.0292257	0.0145238	0.736712
N04201p586600	Bin 201	4	586600	666472	79872	0.0299539	0.0471774	0.0356304	0.382249
N04202p666472	Bin 202	4	666472	1872427	1205955	0.0216005	0.145092	0.0244145	0.537631
N04203p1872427	Bin 203	4	1872427	2043908	171481	0.0337022	0.0292928	0.0574315	0.18524
N04204p2043908	Bin 204	4	2043908	2381686	337778	0.0433645	0.0050428	0.0499093	0.239192
N04205p2381686	Bin 205	4	2381686	4302959	1921273	0.0362101	0.0187502	0.0607702	0.153751
N04206p4302959	Bin 206	4	4302959	4601452	298493	0.0385537	0.0135337	0.0423883	0.348451
N04207p4601452	Bin 207	4	4601452	4741085	139633	0.038506	0.0134899	0.0153317	0.736802
N04208p4741085	Bin 208	4	4741085	5208985	467900	0.0144116	0.357616	0.00464218	0.923895
N04209p5208985	Bin 209	4	5208985	5316873	107888	0.0441709	0.00360437	0.0591359	0.166051
N04210p5316873	Bin 210	4	5316873	5500030	183157	0.0432164	0.00468777	0.0862479	0.0424181
N04211p5500030	Bin 211	4	5500030	5985673	485643	0.0336171	0.0146843	0.060769	0.0717318
N04212p5985673	Bin 212	4	5985673	15492783	9507110	0.0336171	0.0146843	0.060769	0.0717318
N04213p15492783	Bin 213	4	15492783	16766495	1273712	-0.0392093	0.0240168	-0.0984625	0.0979365
N04214p16766495	Bin 214	4	16766495	16924548	158053	-0.00154446	0.925076	0.0210274	0.671265
N04215p16924548	Bin 215	4	16924548	17295310	370762	-0.00856494	0.60805	-0.00248488	0.961789
N04216p17295310	Bin 216	4	17295310	17552935	257625	-0.0127645	0.451196	-0.00749982	0.890241
N04217p17552935	Bin 217	4	17552935	19401137	1848202	-0.00377437	0.820468	0.0187584	0.714841
N04218p19401137	Bin 218	4	19401137	19600324	199187	-0.0229987	0.147083	-0.0386278	0.410159
N04219p19600324	Bin 219	4	19600324	19890398	290074	-0.0101809	0.503487	-0.0156136	0.720439
N04220p19890398	Bin 220	4	19890398	20508686	618288	0.00142258	0.922445	0.00718694	0.851069
N04221p20508686	Bin 221	4	20508686	20542029	33343	0.000703241	0.962523	0.000389957	0.992308
N04222p20542029	Bin 222	4	20542029	20709819	167790	0.00260649	0.860805	0.0104972	0.791231
N04223p20709819	Bin 223	4	20709819	20909472	199653	0.000245767	0.986777	-0.0186114	0.642292
N04224p20909472	Bin 224	4	20909472	21243526	334054	0.00106467	0.940855	-0.00993415	0.787081
N04225p21243526	Bin 225	4	21243526	21713928	470402	-0.0083378	0.565625	-0.0323365	0.397302
N04226p21713928	Bin 226	4	21713928	21971419	257491	-0.0140687	0.320445	-0.0584002	0.104869
N04227p21971419	Bin 227	4	21971419	23338467	1367048	0.0140475	0.334211	0.0195173	0.612722
N04228p23338467	Bin 228	4	23338467	23787085	448618	0.0140475	0.334211	0.0195173	0.612722
N04229p23787085	Bin 229	4	23787085	25888164	2101079	0.0140475	0.334211	0.0195173	0.612722
N04230p25888164	Bin 230	4	25888164	26167784	279620	-0.00874591	0.5285	-0.0572018	0.107599
N04231p26167784	Bin 231	4	26167784	26341172	173388	-0.00551892	0.693359	-0.0421309	0.246791
N04232p26341172	Bin 232	4	26341172	26935082	593910	-0.00551892	0.693359	-0.0421309	0.246791
N04233p26935082	Bin 233	4	26935082	29781550	2846468	-0.00874591	0.5285	-0.0572018	0.107599
N04234p29781550	Bin 234	4	29781550	29860667	79117	-0.00507493	0.714977	-0.0112081	0.749184
N04235p29860667	Bin 235	4	29860667	29993182	132515	-0.00720665	0.616377	-0.0403206	0.285688
N04236p29993182	Bin 236	4	29993182	30012604	19422	-0.0207065	0.16989	-0.0664803	0.108249
N04237p30012604	Bin 237	4	30012604	30310265	297661	-0.0163925	0.278736	-0.0503408	0.224809
N04238p30310265	Bin 238	4	30310265	30726305	416040	-0.0140049	0.34937	-0.0238319	0.548523
N04239p30726305	Bin 239	4	30726305	30811193	84888	-0.000910197	0.949539	-0.000250616	0.994584
N04240p30811193	Bin 240	4	30811193	30948867	137674	-0.00345295	0.814943	-0.011126	0.779969
N04241p30948867	Bin 241	4	30948867	31318328	369461	-0.00139946	0.924516	-0.0208924	0.599357
N04242p31318328	Bin 242	4	31318328	31907977	589649	0.000787741	0.957654	0.00746864	0.850961
N04243p31907977	Bin 243	4	31907977	32095167	187190	0.00468324	0.748279	0.0394895	0.300403
N04244p32095167	Bin 244	4	32095167	32519164	423997	-0.00730276	0.62964	0.0195587	0.630614
N04245p32519164	Bin 245	4	32519164	32889662	370498	-0.00791833	0.601701	0.01693	0.677874
N04246p32889662	Bin 246	4	32889662	32971084	81422	-0.00192867	0.901245	0.0158448	0.72213
N04247p32971084	Bin 247	4	32971084	33258884	287800	0.00836725	0.569194	0.0505484	0.188257
N04248p33258884	Bin 248	4	33258884	33344629	85745	-0.0148469	0.314097	-0.00792253	0.83759
N04249p33344629	Bin 249	4	33344629	33510001	165372	-0.0208936	0.171807	-0.0201716	0.640808
N04250p33510001	Bin 250	4	33510001	34400370	890369	-0.0197627	0.19577	-0.0124977	0.773556
N04251p34400370	Bin 251	4	34400370	34473955	73585	-0.0197627	0.19577	-0.0124977	0.773556
N04252p34473955	Bin 252	4	34473955	34642920	168965	-0.012573	0.401304	-0.0291831	0.471068
N04253p34642920	Bin 253	4	34642920	34853190	210270	0.00143228	0.922605	0.0030373	0.93717
N04254p34853190	Bin 254	4	34853190	34931819	78629	-0.0124063	0.419411	-0.0277178	0.520917
N04255p34931819	Bin 255	4	34931819	35000168	68349	0.00178706	0.911003	-0.0406481	0.397491
N04256p35000168	Bin 256	4	35000168	35502694	502526	0.0137654	0.369705	0.00437654	0.920301
N05257p101129	Bin 257	5	101129	207831	106702	-0.0149583	0.38488	-0.0170124	0.757777
N05258p207831	Bin 258	5	207831	350204	142373	-0.00466304	0.779497	-0.0156884	0.755879
N05259p350204	Bin 259	5	350204	2005608	1655404	-0.0079809	0.629278	-0.0288525	0.558492
N05260p2005608	Bin 260	5	2005608	2087725	82117	-0.00873586	0.602262	-0.0728814	0.159518
N05261p2087725	Bin 261	5	2087725	2300629	212904	-0.0169793	0.3282	-0.0752443	0.187607
N05262p2300629	Bin 262	5	2300629	2342662	42033	-0.0502435	0.00237476	-0.105417	0.0308989
N05263p2342662	Bin 263	5	2342662	3801771	1459109	-0.0632899	0.000136406	-0.139803	0.00451147
N05264p3801771	Bin 264	5	3801771	3873430	71659	-0.0344446	0.0504385	-0.103528	0.0787401
N05265p3873430	Bin 265	5	3873430	4260855	387425	-0.0399189	0.0223917	-0.099172	0.0844824
N05266p4260855	Bin 266	5	4260855	5466242	1205387	-0.0192423	0.263785	-0.0510096	0.355991
N05267p5466242	Bin 267	5	5466242	6619199	1152957	-0.00861514	0.602376	0.00480857	0.923964
N05268p6619199	Bin 268	5	6619199	6750683	131484	-0.00813763	0.62191	0.00301688	0.951136
N05269p6750683	Bin 269	5	6750683	7196215	445532	-0.0117252	0.456526	-0.0112869	0.796592
N05270p7196215	Bin 270	5	7196215	7302018	105803	-0.0171761	0.257091	-0.0283466	0.479829
N05271p7302018	Bin 271	5	7302018	7493155	191137	-0.0171761	0.257091	-0.0283466	0.479829
N05272p7493155	Bin 272	5	7493155	7903889	410734	-0.0171761	0.257091	-0.0283466	0.479829
N05273p7903889	Bin 273	5	7903889	7993072	89183	0.00649232	0.673845	0.0414832	0.342882
N05274p7993072	Bin 274	5	7993072	10670612	2677540	-0.0024898	0.871938	-0.0111537	0.796887
N05275p10670612	Bin 275	5	10670612	13807670	3137058	-0.0024898	0.871938	-0.0111537	0.796887
N05276p13807670	Bin 276	5	13807670	17238253	3430583	-0.0024898	0.871938	-0.0111537	0.796887
N05277p17238253	Bin 277	5	17238253	17304225	65972	-0.0143997	0.365944	-0.0135994	0.769446
N05278p17304225	Bin 278	5	17304225	17601788	297563	-0.00685487	0.661451	-0.039406	0.369149
N05279p17601788	Bin 279	5	17601788	18000609	398821	-0.00527727	0.737809	-0.0154343	0.730164
N05280p18000609	Bin 280	5	18000609	18200323	199714	-0.0197584	0.207303	-0.0704011	0.111203
N05281p18200323	Bin 281	5	18200323	18477820	277497	-0.0171509	0.273454	-0.0882704	0.0481248
N05282p18477820	Bin 282	5	18477820	19100244	622424	-0.024949	0.117881	-0.147463	0.00167828
N05283p19100244	Bin 283	5	19100244	19883830	783586	-0.0207203	0.193852	-0.12347	0.00830483
N05284p19883830	Bin 284	5	19883830	20270895	387065	-0.0202287	0.202127	-0.112893	0.0143233
N05285p20270895	Bin 285	5	20270895	20948083	677188	-0.00197901	0.898805	-0.0556664	0.19687
N05286p20948083	Bin 286	5	20948083	21396536	448453	-0.000736791	0.961891	-0.0405754	0.337295
N05287p21396536	Bin 287	5	21396536	21610913	214377	0.00698251	0.66229	-0.023316	0.6071
N05288p21610913	Bin 288	5	21610913	24112649	2501736	0.0066961	0.676373	-0.038877	0.397715
N05289p24112649	Bin 289	5	24112649	24975949	863300	0.0208684	0.214378	0.0216621	0.68357
N05290p24975949	Bin 290	5	24975949	28792455	3816506	0.00992713	0.539748	-0.0509267	0.283066
N05291p28792455	Bin 291	5	28792455	29958434	1165979	0.00493742	0.778704	-0.03453	0.560732
N06292p142476	Bin 292	6	142476	595294	452818	0.00228841	0.882902	0.020728	0.632899
N06293p595294	Bin 293	6	595294	701809	106515	0.0100622	0.536203	0.0116278	0.807551
N06294p701809	Bin 294	6	701809	946590	244781	0.0100622	0.536203	0.0116278	0.807551
N06295p946590	Bin 295	6	946590	2396497	1449907	0.0118823	0.489716	-0.00435241	0.936204
N06296p2396497	Bin 296	6	2396497	3993744	1597247	0.00687559	0.687602	-0.0157192	0.766587
N06297p3993744	Bin 297	6	3993744	6748358	2754614	0.0118823	0.489716	-0.00435241	0.936204
N06298p06748358	Bin 298	6	6748358	8231471	1483113	0.00963692	0.545614	-0.0170137	0.717657
N06299p8231471	Bin 299	6	8231471	8374697	143226	0.0222483	0.157881	0.0154834	0.725888
N06300p8374697	Bin 300	6	8374697	10605450	2230753	0.0230451	0.167631	0.0723998	0.166571
N06301p10605450	Bin 301	6	10605450	10999716	394266	0.0166914	0.318618	0.0250636	0.640819
N06302p10999716	Bin 302	6	10999716	11503588	503872	0.0218379	0.184575	0.0660435	0.184793
N06303p11503588	Bin 303	6	11503588	12049459	545871	0.00633114	0.716509	0.0368878	0.523429
N06304p12049459	Bin 304	6	12049459	14411934	2362475	0.0244234	0.118789	0.0561218	0.18608
N06305p14411934	Bin 305	6	14411934	17595901	3183967	0.0222446	0.197883	0.00671952	0.908426
N06306p17595901	Bin 306	6	17595901	19441741	1845840	-0.0311508	0.0668676	-0.068358	0.207829
N06307p19441741	Bin 307	6	19441741	19630637	188896	0.0237465	0.138561	0.0781162	0.0924073
N06308p19630637	Bin 308	6	19630637	19865075	234438	0.0257143	0.100766	0.0624309	0.157643
N06309p19865075	Bin 309	6	19865075	19869151	4076	0.0257143	0.100766	0.0624309	0.157643
N06310p19869151	Bin 310	6	19869151	20412248	543097	0.0237465	0.138561	0.0781162	0.0924073
N06311p20412248	Bin 311	6	20412248	24000865	3588617	0.00630821	0.685878	0.0141456	0.748524
N06312p24000865	Bin 312	6	24000865	26400689	2399824	0.00630821	0.685878	0.0141456	0.748524
N06313p26400689	Bin 313	6	26400689	26553263	152574	-0.000986892	0.951179	0.0377465	0.427583
N06314p26553263	Bin 314	6	26553263	27500835	947572	-0.0334198	0.0250109	-0.043229	0.29661
N06315p27500835	Bin 315	6	27500835	27612798	111963	-0.0318609	0.0300519	-0.0206052	0.607599
N06316p27612798	Bin 316	6	27612798	27910044	297246	-0.0318609	0.0300519	-0.0206052	0.607599
N06317p27910044	Bin 317	6	27910044	28173042	262998	-0.0410057	0.00760984	-0.0563104	0.200138
N06318p28173042	Bin 318	6	28173042	29693585	1520543	-0.0396865	0.0094065	-0.0792861	0.0715876
N06319p29693585	Bin 319	6	29693585	31112049	1418464	-0.0277107	0.067602	-0.062514	0.154389
N06320p31112049	Bin 320	6	31112049	31248787	136738	-0.0236432	0.107336	-0.0572671	0.157825
N07321p9802	Bin 321	7	9802	504786	494984	0.0157806	0.33234	0.0272219	0.565906
N07322p504786	Bin 322	7	504786	798686	293900	0.011238	0.495079	0.0191412	0.691534
N07323p798686	Bin 323	7	798686	2100856	1302170	0.0142019	0.387039	0.0323634	0.498655
N07324p2100856	Bin 324	7	2100856	2440939	340083	0.00968405	0.545587	0.00855326	0.857156
N07325p2440939	Bin 325	7	2440939	2790302	349363	0.000836208	0.959224	-0.0126595	0.799606
N07326p2790302	Bin 326	7	2790302	3117113	326811	0.00410715	0.790594	-0.00249179	0.954913
N07327p3117113	Bin 327	7	3117113	3395232	278119	0.000799683	0.959712	-0.00725203	0.875687
N07328p3395232	Bin 328	7	3395232	3672199	276967	0.0118275	0.445295	0.0190132	0.664746
N07329p3672199	Bin 329	7	3672199	3845804	173605	0.0106953	0.487024	0.0334267	0.433029
N07330p3845804	Bin 330	7	3845804	4170738	324934	0.000556297	0.971835	0.0109314	0.80892
N07331p4170738	Bin 331	7	4170738	4909839	739101	0.00339168	0.827128	0.0172542	0.693871
N07332p4909839	Bin 332	7	4909839	5002210	92371	0.0186084	0.216748	0.0284254	0.486171
N07333p5002210	Bin 333	7	5002210	5128208	125998	0.02347	0.114768	0.0460833	0.237995
N07334p5128208	Bin 334	7	5128208	5236763	108555	0.0285073	0.0605164	0.01536	0.714325
N07335p5236763	Bin 335	7	5236763	5728057	491294	0.020472	0.18879	-0.00688604	0.877082
N07336p5728057	Bin 336	7	5728057	5897589	169532	0.0224911	0.148156	-0.0249564	0.575438
N07337p5897589	Bin 337	7	5897589	6901226	1003637	0.0208776	0.196902	0.0203374	0.663595
N07338p6901226	Bin 338	7	6901226	7651467	750241	0.0223571	0.167536	0.0339023	0.47253
N07339p7651467	Bin 339	7	7651467	8400759	749292	0.0318116	0.0442399	0.0579039	0.192535
N07340p8400759	Bin 340	7	8400759	12286769	3886010	0.0104198	0.508977	-0.0310291	0.483686
N07341p12286769	Bin 341	7	12286769	15283320	2996551	0.014373	0.373896	-0.0750569	0.120335
N07342p15283320	Bin 342	7	15283320	17003242	1719922	0.0067421	0.670031	-0.0529038	0.235418
N07343p17003242	Bin 343	7	17003242	17679137	675895	-0.00306896	0.85099	-0.100504	0.0408876
N07344p17679137	Bin 344	7	17679137	18529660	850523	0.018134	0.254178	-0.00824445	0.857771
N07345p18529660	Bin 345	7	18529660	19248844	719184	0.0243063	0.121084	-0.0215975	0.623228
N07346p19248844	Bin 346	7	19248844	19300288	51444	0.0206299	0.187354	0.011472	0.790026
N07347p19300288	Bin 347	7	19300288	19397439	97151	0.0201573	0.209247	0.00439493	0.924502
N07348p19397439	Bin 348	7	19397439	19499306	101867	0.015604	0.33699	0.0160503	0.737408
N07349p19499306	Bin 349	7	19499306	19545562	46256	0.015604	0.33699	0.0160503	0.737408
N07350p19545562	Bin 350	7	19545562	19847138	301576	0.0237365	0.139662	0.0023199	0.959892
N07351p19847138	Bin 351	7	19847138	19900879	53741	0.0237365	0.139662	0.0023199	0.959892
N07352p19900879	Bin 352	7	19900879	20902199	1001320	-0.00575609	0.721926	-0.0498142	0.290345
N07353p20902199	Bin 353	7	20902199	21151779	249580	0.00336908	0.822686	-0.0183197	0.649733
N07354p21151779	Bin 354	7	21151779	21909694	757915	0.00336908	0.822686	-0.0183197	0.649733
N07355p21909694	Bin 355	7	21909694	22510537	600843	0.00264634	0.867317	-0.00660265	0.88543
N07356p22510537	Bin 356	7	22510537	22631553	121016	0.0066448	0.663887	0.00739186	0.859038
N07357p22631553	Bin 357	7	22631553	23186109	554556	0.0180166	0.247662	0.0780787	0.0818663
N07358p23186109	Bin 358	7	23186109	24000239	814130	0.00786665	0.6059	0.0460521	0.276212
N07359p24000239	Bin 359	7	24000239	24382028	381789	0.0124712	0.415405	0.0393877	0.346904
N07360p24382028	Bin 360	7	24382028	24502061	120033	0.0141531	0.361748	0.0681421	0.111232
N07361p24502061	Bin 361	7	24502061	25002220	500159	0.0226315	0.139742	0.0851265	0.0394059
N07362p25002220	Bin 362	7	25002220	25108269	106049	0.0202866	0.185966	0.0709649	0.0903773
N07363p25108269	Bin 363	7	25108269	27736013	2627744	0.0110177	0.479607	0.0518748	0.237124
N07364p27736013	Bin 364	7	27736013	28378091	642078	0.00603535	0.689287	-0.00513678	0.901343
N07365p28378091	Bin 365	7	28378091	29000683	622592	0.0243108	0.113146	0.0700114	0.104095
N07366p29000683	Bin 366	7	29000683	29400732	400049	0.0232432	0.11998	0.0728328	0.0762498
N07367p29400732	Bin 367	7	29400732	29616705	215973	0.0346494	0.0184883	0.0912904	0.0215054
N07368p29616705	Bin 368	7	29616705	29697621	80916	0.0366923	0.0241929	-0.0441176	0.394929
N08369p61082	Bin 369	8	61082	1125921	1064839	0.0138929	0.314046	0.0386886	0.246122
N08370p1125921	Bin 370	8	1125921	1622169	496248	0.0138929	0.314046	0.0386886	0.246122
N08371p1622169	Bin 371	8	1622169	1665612	43443	0.0222777	0.148199	0.0569174	0.204161
N08372p1665612	Bin 372	8	1665612	2672450	1006838	0.0222777	0.148199	0.0569174	0.204161
N08373p2672450	Bin 373	8	2672450	3030687	358237	0.0283439	0.0673926	0.0876926	0.0397166
N08374p3030687	Bin 374	8	3030687	3612083	581396	0.0247029	0.132317	0.0794772	0.0960095
N08375p3612083	Bin 375	8	3612083	3800983	188900	0.0247029	0.132317	0.0794772	0.0960095
N08376p3800983	Bin 376	8	3800983	4366152	565169	0.0247029	0.132317	0.0794772	0.0960095
N08377p4366152	Bin 377	8	4366152	5117699	751547	0.0320861	0.0441744	0.0787586	0.0783447
N08378p5117699	Bin 378	8	5117699	8101734	2984035	0.0320861	0.0441744	0.0787586	0.0783447
N08379p8101734	Bin 379	8	8101734	8495042	393308	-0.0211491	0.189696	-0.0289016	0.530613
N08380p8495042	Bin 380	8	8495042	9400393	905351	-0.0355985	0.0350533	-0.0882989	0.102833
N08381p9400393	Bin 381	8	9400393	9627673	227280	-0.0558282	0.00093367	-0.137134	0.0120615
N08382p9627673	Bin 382	8	9627673	15817664	6189991	-0.0711139	5.48815e-06	-0.161569	0.000267414
N08383p15817664	Bin 383	8	15817664	19087675	3270011	-0.040631	0.00426616	-0.0872536	0.0170878
N08384p19087675	Bin 384	8	19087675	19200201	112526	-0.0313789	0.0443505	-0.0527813	0.276127
N08385p19200201	Bin 385	8	19200201	19728515	528314	-0.0228052	0.146716	-0.0242507	0.611618
N08386p19728515	Bin 386	8	19728515	20139730	411215	-0.0228052	0.146716	-0.0242507	0.611618
N08387p20139730	Bin 387	8	20139730	20500371	360641	-0.0281578	0.0610246	-0.0466457	0.27177
N08388p20500371	Bin 388	8	20500371	20688224	187853	-0.0281578	0.0610246	-0.0466457	0.27177
N08389p20688224	Bin 389	8	20688224	21593653	905429	-0.0346364	0.0247702	-0.080577	0.0732334
N08390p21593653	Bin 390	8	21593653	22500359	906706	-0.033544	0.0323296	-0.096542	0.0345795
N08391p22500359	Bin 391	8	22500359	23447319	946960	-0.033544	0.0323296	-0.096542	0.0345795
N08392p23447319	Bin 392	8	23447319	24691803	1244484	-0.0418283	0.00767902	-0.129129	0.00559654
N08393p24691803	Bin 393	8	24691803	26071986	1380183	-0.0449824	0.00316929	-0.117545	0.00856507
N08394p26071986	Bin 394	8	26071986	26098341	26355	-0.00436397	0.783391	-0.0286313	0.568599
N08395p26098341	Bin 395	8	26098341	28443022	2344681	0.0138929	0.314046	0.0386886	0.246122
N09396p3468835	Bin 396	9	3468835	5927366	2458531	0.0140687	0.357549	0.0279025	0.503699
N09397p5927366	Bin 397	9	5927366	7020221	1092855	0.0157148	0.300342	0.035772	0.372177
N09398p7020221	Bin 398	9	7020221	7101663	81442	0.00535412	0.724488	0.0173679	0.667472
N09399p7101663	Bin 399	9	7101663	7140542	38879	0.000275471	0.985293	0.00304322	0.937318
N09400p7140542	Bin 400	9	7140542	8001195	860653	0.00766257	0.605965	0.0199258	0.602607
N09401p8001195	Bin 401	9	8001195	9045950	1044755	0.00766257	0.605965	0.0199258	0.602607
N09402p9045950	Bin 402	9	9045950	9227997	182047	0.000275471	0.985293	0.00304322	0.937318
N09403p9227997	Bin 403	9	9227997	9479815	251818	-0.00735664	0.619815	-0.0481802	0.211573
N09404p9479815	Bin 404	9	9479815	9855389	375574	-0.00457547	0.757456	-0.0354333	0.357699
N09405p9855389	Bin 405	9	9855389	10524648	669259	-0.0074614	0.619836	-0.0275159	0.501092
N09406p10524648	Bin 406	9	10524648	11271537	746889	0.00369906	0.807598	0.0171345	0.686394
N09407p11271537	Bin 407	9	11271537	12081674	810137	0.0135767	0.367778	0.0391139	0.34416
N09408p12081674	Bin 408	9	12081674	12673552	591878	0.011573	0.431978	0.0295943	0.437993
N09409p12673552	Bin 409	9	12673552	13003381	329829	0.000516318	0.972088	0.0045273	0.906795
N09410p13003381	Bin 410	9	13003381	13202214	198833	0.00956523	0.527894	0.0303335	0.45917
N09411p13202214	Bin 411	9	13202214	13823635	621421	0.00640695	0.670787	0.014362	0.725389
N09412p13823635	Bin 412	9	13823635	14016210	192575	0.0131134	0.385459	-0.00105297	0.97936
N09413p14016210	Bin 413	9	14016210	14548336	532126	-0.00591919	0.704945	-0.0592757	0.186396
N09414p14548336	Bin 414	9	14548336	15020535	472199	-0.00591919	0.704945	-0.0592757	0.186396
N09415p15020535	Bin 415	9	15020535	15483245	462710	0.00439103	0.781856	-0.0183819	0.693986
N09416p15483245	Bin 416	9	15483245	16652226	1168981	0.0222125	0.152101	0.0378963	0.389817
N09417p16652226	Bin 417	9	16652226	17738558	1086332	0.0115225	0.492182	0.0347696	0.515772
N09418p17738558	Bin 418	9	17738558	20855599	3117041	0.0158014	0.357469	0.039664	0.486659
N09419p20855599	Bin 419	9	20855599	20992651	137052	0.000734065	0.964437	-0.0516959	0.31432
N09420p20992651	Bin 420	9	20992651	21469374	476723	-0.00447774	0.784336	-0.0462159	0.357065
N09421p21469374	Bin 421	9	21469374	21576196	106822	-0.0033708	0.832842	-0.0518072	0.270373
N09422p21576196	Bin 422	9	21576196	21938055	361859	0.0111673	0.474024	0.0201724	0.650369
N09423p21938055	Bin 423	9	21938055	22641750	703695	0.0135915	0.375633	0.00824858	0.845712
N09424p22641750	Bin 424	9	22641750	22789145	147395	0.0146987	0.352974	0.0437927	0.342167
N09425p22789145	Bin 425	9	22789145	23012720	223575	0.0164105	0.300526	0.0519816	0.25979
N10426p55673	Bin 426	10	55673	806844	751171	0.000598884	0.970159	-0.0156333	0.741077
N10427p806844	Bin 427	10	806844	1418360	611516	-0.00459769	0.770715	-0.00809463	0.859366
N10428p1418360	Bin 428	10	1418360	1515971	97611	-0.016796	0.271455	-0.0268006	0.516256
N10429p1515971	Bin 429	10	1515971	1839966	323995	-0.0207214	0.16876	-0.0463876	0.238528
N10430p1839966	Bin 430	10	1839966	2739904	899938	-0.0210724	0.158989	-0.0479615	0.218803
N10431p2739904	Bin 431	10	2739904	2812481	72577	-0.0170662	0.257602	-0.014814	0.710477
N10432p2812481	Bin 432	10	2812481	3966764	1154283	-0.0193076	0.204167	-0.0245754	0.545303
N10433p3966764	Bin 433	10	3966764	4665291	698527	-0.0421938	0.00556277	-0.0539052	0.184518
N10434p4665291	Bin 434	10	4665291	5462025	796734	-0.0272327	0.0843973	-0.0304823	0.507246
N10435p5462025	Bin 435	10	5462025	6404197	942172	-0.0315134	0.0457234	-0.0622277	0.176356
N10436p6404197	Bin 436	10	6404197	8916927	2512730	-0.0210249	0.169747	-0.0847605	0.0431496
N10437p8916927	Bin 437	10	8916927	10103391	1186464	-0.0502737	0.000844347	-0.0989018	0.0122776
N10438p10103391	Bin 438	10	10103391	10286492	183101	-0.0532662	0.00040993	-0.1432	0.00031547
N10439p10286492	Bin 439	10	10286492	10662578	376086	-0.061597	5.97039e-05	-0.145588	0.000563339
N10440p10662578	Bin 440	10	10662578	11717645	1055067	-0.0590781	0.000122571	-0.104436	0.0137195
N10441p11717645	Bin 441	10	11717645	13221176	1503531	-0.0720041	4.79694e-06	-0.139041	0.00245906
N10442p13221176	Bin 442	10	13221176	13942608	721432	-0.032108	0.0390721	-0.0746106	0.0884171
N10443p13942608	Bin 443	10	13942608	14800639	858031	-0.020249	0.200085	-0.0582662	0.204699
N10444p14800639	Bin 444	10	14800639	15016518	215879	0.0145827	0.371771	0.0242524	0.628321
N10445p15016518	Bin 445	10	15016518	17900158	2883640	0.00225506	0.887415	-0.0161107	0.730001
N10446p17900158	Bin 446	10	17900158	18000039	99881	0.0244781	0.111951	0.00469712	0.911754
N10447p18000039	Bin 447	10	18000039	18500793	500754	0.0264882	0.0853499	0.0103275	0.81559
N10448p18500793	Bin 448	10	18500793	18702352	201559	0.0108834	0.499223	-0.0235066	0.626243
N10449p18702352	Bin 449	10	18702352	18706998	4646	0.00166276	0.913881	-0.0422984	0.336094
N10450p18706998	Bin 450	10	18706998	20284515	1577517	0.0110992	0.445354	-0.0212767	0.566268
N10451p20284515	Bin 451	10	20284515	21800135	1515620	-0.0130049	0.420244	-0.0339227	0.483311
N10452p21800135	Bin 452	10	21800135	23207287	1407152	-0.0142963	0.380881	-0.0429779	0.382597
N11453p107456	Bin 453	11	107456	800028	692572	0.023037	0.141423	0.041071	0.354911
N11454p800028	Bin 454	11	800028	1300036	500008	-0.00456201	0.765029	-0.0188409	0.669628
N11455p1300036	Bin 455	11	1300036	1853016	552980	0.023037	0.141423	0.041071	0.354911
N11456p1853016	Bin 456	11	1853016	1947983	94967	0.0182626	0.250419	0.0127313	0.779391
N11457p1947983	Bin 457	11	1947983	2436354	488371	0.0195548	0.220138	0.035069	0.447559
N11458p2436354	Bin 458	11	2436354	2500185	63831	0.0336171	0.0146843	0.060769	0.0717318
N11459p2500185	Bin 459	11	2500185	2846280	346095	0.0336171	0.0146843	0.060769	0.0717318
N11460p2846280	Bin 460	11	2846280	3285978	439698	0.0336171	0.0146843	0.060769	0.0717318
N11461p3285978	Bin 461	11	3285978	3900526	614548	0.0364575	0.0221502	0.085829	0.0908335
N11462p3900526	Bin 462	11	3900526	4433967	533441	0.00787594	0.570541	0.0104644	0.773504
N11463p4433967	Bin 463	11	4433967	4464320	30353	0.00823355	0.557923	0.0173838	0.641374
N11464p4464320	Bin 464	11	4464320	5168114	703794	1.8537e-05	0.998926	0.00977654	0.783439
N11465p5168114	Bin 465	11	5168114	5805234	637120	0.00599515	0.65936	0.0271419	0.427806
N11466p5805234	Bin 466	11	5805234	5887594	82360	0.00549295	0.681386	0.0205447	0.529672
N11467p5887594	Bin 467	11	5887594	6463155	575561	0.0157564	0.271104	0.0429621	0.278566
N11468p6463155	Bin 468	11	6463155	6507924	44769	0.00789498	0.589919	-0.0339197	0.420448
N11469p6507924	Bin 469	11	6507924	7204422	696498	-0.00533598	0.707368	-0.0876382	0.0258389
N11470p7204422	Bin 470	11	7204422	7593545	389123	0.00687506	0.611228	0.00362955	0.914853
N11471p7593545	Bin 471	11	7593545	7880671	287126	0.00960167	0.492875	0.0459457	0.22701
N11472p7880671	Bin 472	11	7880671	8082308	201637	0.0140141	0.314907	0.0529453	0.150659
N11473p8082308	Bin 473	11	8082308	8799582	717274	0.0116561	0.388468	0.0133724	0.684551
N11474p8799582	Bin 474	11	8799582	11128831	2329249	0.0150429	0.294926	0.0345568	0.390773
N11475p11128831	Bin 475	11	11128831	15302863	4174032	0.0116561	0.388468	0.0133724	0.684551
N11476p15302863	Bin 476	11	15302863	15977859	674996	0.0100358	0.461056	0.0110715	0.742985
N11477p15977859	Bin 477	11	15977859	17000104	1022245	0.0141316	0.299374	0.0232713	0.485086
N11478p17000104	Bin 478	11	17000104	17301403	301299	-0.00169552	0.90274	-0.00677229	0.848693
N11479p17301403	Bin 479	11	17301403	17318687	17284	0.0110276	0.437158	0.0571857	0.134289
N11480p17318687	Bin 480	11	17318687	17801489	482802	0.0117319	0.410138	0.0415835	0.277506
N11481p17801489	Bin 481	11	17801489	17949100	147611	0.0149911	0.292822	0.0504504	0.185105
N11482p17949100	Bin 482	11	17949100	18156245	207145	0.015232	0.285458	0.0545028	0.150872
N11483p18156245	Bin 483	11	18156245	18201217	44972	0.0359858	0.0207716	0.0871829	0.0547703
N11484p18201217	Bin 484	11	18201217	18923176	721959	0.031212	0.0345113	0.0489538	0.217419
N11485p18923176	Bin 485	11	18923176	20112018	1188842	0.017724	0.253659	0.023726	0.588184
N11486p20112018	Bin 486	11	20112018	20573568	461550	0.0122902	0.453945	0.00475475	0.92259
N11487p20573568	Bin 487	11	20573568	21001699	428131	0.0136426	0.377863	0.012776	0.76509
N11488p21001699	Bin 488	11	21001699	21819231	817532	0.00796511	0.60447	0.000377056	0.993023
N11489p21819231	Bin 489	11	21819231	23240773	1421542	0.00782589	0.622624	-0.0116348	0.802477
N11490p23240773	Bin 490	11	23240773	23864012	623239	-0.000284624	0.986232	-0.0405821	0.43783
N11491p23864012	Bin 491	11	23864012	24674361	810349	0.00488844	0.760075	-0.000643911	0.989092
N11492p24674361	Bin 492	11	24674361	25862368	1188007	0.00419526	0.794262	0.00282917	0.951857
N11493p25862368	Bin 493	11	25862368	26505369	643001	0.00390352	0.813146	0.00852238	0.864367
N11494p26505369	Bin 494	11	26505369	26945990	440621	0.00577751	0.728406	0.0219623	0.664788
N11495p26945990	Bin 495	11	26945990	27957347	1011357	0.00252969	0.882213	0.0138052	0.797623
N11496p27957347	Bin 496	11	27957347	29021106	1063759	0.00477994	0.779801	-9.3845e-05	0.998616
N12497p152441	Bin 497	12	152441	1139621	987180	0.00904304	0.591789	-0.0371905	0.496226
N12498p1139621	Bin 498	12	1139621	3012555	1872934	-0.0269318	0.142785	-0.275262	3.78143e-05
N12499p3012555	Bin 499	12	3012555	3143932	131377	-0.00324969	0.830155	-0.00711219	0.873919
N12500p3143932	Bin 500	12	3143932	3922076	778144	-0.00882388	0.571868	0.0203163	0.661992
N12501p3922076	Bin 501	12	3922076	4867702	945626	-0.00605767	0.698588	0.0476749	0.2996
N12502p4867702	Bin 502	12	4867702	4910622	42920	-0.00573803	0.704757	0.0550876	0.192157
N12503p4910622	Bin 503	12	4910622	9228549	4317927	-0.00573803	0.704757	0.0550876	0.192157
N12504p9228549	Bin 504	12	9228549	9328006	99457	0.00145365	0.924955	0.100422	0.020969
N12505p9328006	Bin 505	12	9328006	9798177	470171	0.00517552	0.737927	0.0898849	0.0413132
N12506p9798177	Bin 506	12	9798177	9922308	124131	0.00711693	0.642549	0.096672	0.0223601
N12507p9922308	Bin 507	12	9922308	10292580	370272	0.00949269	0.54885	0.0954371	0.0362082
N12508p10292580	Bin 508	12	10292580	13098568	2805988	0.00949269	0.54885	0.0954371	0.0362082
N12509p13098568	Bin 509	12	13098568	13760980	662412	0.00711693	0.642549	0.096672	0.0223601
N12510p13760980	Bin 510	12	13760980	14451520	690540	0.00528008	0.737618	0.0806099	0.076883
N12511p14451520	Bin 511	12	14451520	14829059	377539	0.00266413	0.863826	0.0418997	0.350416
N12512p14829059	Bin 512	12	14829059	16697382	1868323	0.00266413	0.863826	0.0418997	0.350416
N12513p16697382	Bin 513	12	16697382	22610780	5913398	0.00120442	0.938296	0.0136759	0.766685
N12514p22610780	Bin 514	12	22610780	23891417	1280637	-0.0188069	0.205682	-0.0379642	0.364967
N12515p23891417	Bin 515	12	23891417	25860695	1969278	0.00664522	0.711583	0.0335053	0.59216
N12516p25860695	Bin 516	12	25860695	26927862	1067167	-0.00219934	0.89844	-0.0177851	0.744876
N12517p26927862	Bin 517	12	26927862	27212504	284642	0.0125025	0.482822	0.0791247	0.194321
N12518p27212504	Bin 518	12	27212504	27531856	319352	0.00673228	0.694977	0.0867367	0.11756
