# Supplementary material for: Identification of Genomic Regions and the Isoamylase Gene for Reduced Grain Chalkiness in Rice
Source: PLoS One. 2015 Mar 19;10(3):e0122013. doi: 10.1371/journal.pone.0122013 (PMC4366167; doi:10.1371/journal.pone.0122013)
Supplement: S4 Dataset — (XLS) [file pone.0122013.s004.xls]

## Sheet: Sheet1
S4. The expression pattern of several starch-metabolic genes residing the qPGC8-2 region
														NIP vs ZS97	NIP vs ZS97
Locus	Annotation	Biology	calli	seedling shoot	seedling root	leaf, 4-5cm young panicle	stem, 5 days before heading	sheath, 4-5cm young panicle	panicle, 4-5cm young panicle	spikelet, 3 DAF	endosperm, 7 DAF	endosperm, 14 DAF	endosperm, 21 DAF	NS SNP in CDS	INDEL in CDS
LOC_Os08g39350	glycerophosphoryl diester phosphodiesterase	carbohydrate metabolic process	0.283333	0.416667	0.833333	1	0.333333	0.433333	0.266667	0.3	0.3	0.3	0.2	NO	NO
LOC_Os08g39380	beta 1,2-xylosyltransferase	carbohydrate metabolic process	0.537042	0.601157	0.702437	0.735417	1	0.615309	0.843712	0.852449	0.61174	0.369185	0.615309	NO	NO
LOC_Os08g39860	beta-glucosidase	carbohydrate metabolic process	0.0413261	1	0.153406	0.145595	0.0911444	0.553542	0.0191644	0.519346	0.101408	0.00971844	0.00317893	NO	NO
LOC_Os08g39870	beta-glucosidase	carbohydrate metabolic process	0.00722591	0.737625	1	0.0855482	0.383306	0.493771	0.02799	0.160963	0.0587209	0.0296512	0.0360465	NO	NO
LOC_Os08g40240	calvin cycle protein CP12	carbohydrate metabolic process	NA	NA	NA	NA	NA	NA	NA	NA	NA	NA	NA	NO	NO
LOC_Os08g40270	lectin-like protein kinase	carbohydrate binding	0.286415	0.311625	1	0.622129	0.40028	0.427171	0.37381	0.326471	0.436555	0.864986	0.671569	NO	NO
LOC_Os08g40280	lectin-like protein kinase	carbohydrate binding	NA	NA	NA	NA	NA	NA	NA	NA	NA	NA	NA	YES	NO
LOC_Os08g40330	sulfotransferase domain containing protein	carbohydrate metabolic process	0.0928571	0.553571	0.303571	1	0.303571	0.0678571	0.128571	0.235714	0.232143	0.15	0.128571	NO	NO
LOC_Os08g40930	Alpha amylase (isa1)	carbohydrate metabolic process	0.00906569	0.0181406	0.00406824	0.0295594	0.0891961	0.0271	0.0181591	0.176229	1	0.446008	0.0280431	YES	YES
LOC_Os08g41100	Chitinase family protein precursor	carbohydrate metabolic process	0.262938	0.187464	0.231509	0.129516	0.297063	0.235548	0.108219	0.253857	0.953494	1	0.225559	YES	NO
	The expression values are the relative ones to the highest that scored as 1
