# Supplementary material for: Identification of Genomic Regions and the Isoamylase Gene for Reduced Grain Chalkiness in Rice
Source: PLoS One. 2015 Mar 19;10(3):e0122013. doi: 10.1371/journal.pone.0122013 (PMC4366167; doi:10.1371/journal.pone.0122013)
Supplement: S5 Dataset — (XLS) [file pone.0122013.s005.xls]

## Sheet: association 
S5. The rice varieties used in association analysis of grain chalkiness with the InDel variation
Germplasm	indica/japonica	PGC	DEC	DE2
Sadu-cho	I	52.5	14.3	A
Shan-Huang Zhan-2	I	0.5	0.2	A
Guangluai4hao	I	90.5	41.6	A
Shufeng101	I	95.7	46.3	A
Chengduai3hao	I	87.7	30.3	A
Guichao2hao	I	86.7	25	A
Huke3hao	I	94.5	34.3	A
Sanbaili	I	98	56.8	A
Hongwan1hao	I	64.1	11.5	A
Liushizao	I	96.2	51.1	A
Nantehao	I	98	32.8	A
Esiniu	I	18	3.4	A
Benbanggu	I	86.5	23.8	A
Qitoubaigu	I	99.1	58	A
Hanmadao	I	88.3	28.9	A
Menjiagao1	I	41.4	6.1	A
Xiaohonggu	I	61	15.4	A
Jinxibai	I	94.5	18.7	A
XiangaiB	I	92.3	30.5	A
Aituogu151	I	66.6	23.4	A
Baikehualuo	I	79.1	21.5	A
Liuyezhan	I	92.2	34.2	A
Aihechi	I	85.6	20.8	A
Xuanenchang	I	91.2	39.7	A
Xibaizhan	I	94.8	83.3	A
Zegu	I	98	39	A
Wuzuhonggu	I	94.9	11.5	A
Qitougu	I	63.7	15.1	A
Zhenshan97B	I	79.2	33.7	A
Nanjing11	I	70.9	14.8	A
L301B	I	59.3	23.8	A
Huajingxian74	I	14.4	4.2	A
JP-5	I	72.1	21.6	A
OM997	I	34.5	6.9	A
PSB RC28	I	41.5	9.8	A
IR6	I	4.9	0.8	A
OM1706	I	5.2	0.8	A
C70	I	11.3	2.6	A
Qingsiai16B	I	55.3	15.6	A
Dianrui409B	I	5.1	1.7	A
88B	I	31.2	11.8	A
Xiangwanxia3hao	I	1.1	0.3	A
Taizhongxianxuan2	I	8.5	2.7	A
Dangyu5hao	I	4.8	1.2	A
Huangsiguizhan	I	2.9	0.7	A
Jinyou1hao	I	27	4.6	A
Dongtingwanxian	I	10.3	2	A
Xiangzaoxia7hao	I	52.3	21.7	A
Mowanggunei	I	91.1	75.5	A
BR11	I	27.5	4.7	A
Zihui100	I	46.6	10.3	A
Fengaizhan	I	61.3	15.3	A
Y134	I	7.7	1.5	A
Bg90-2	I	31.8	8.2	A
IR72	I	19.6	6.2	A
Bg94-1	I	6.9	2.5	A
CR203	I	25.5	7.7	A
ASD16	I	76.2	19.1	A
Babaomi	I	37.2	7.4	A
X22	I	12.4	2.3	A
ASD18	I	26.2	10.3	A
Sankecun	I	100	81.2	A
Teqingxuanhui	I	30.5	5.3	A
Chengnongshuijing	I	3	0.4	A
80B	I	22.6	4.5	A
Minghui63	I	8.9	2.3	A
MR185	I	35.2	10.4	A
R644	I	41.1	12.8	A
Milyang23	I	13.2	2.3	A
IR58025B	I	4.6	1.2	A
BASMATI385	I	91.9	25.2	A
C71	I	9.3	2.1	A
Teksichut	I	100	78.1	A
IR68552-55-3-2	J	21.5	5.1	B
Liusha1hao	J	66.8	23.3	B
PeiC122	J	46.9	11.7	B
Menjiading2	I	42.9	7.3	B
Ninghui21	J	29.1	9.4	B
02428	J	95.7	47.3	B
Pokhreli	I	21.5	7.4	B
RUBIO	J	14.1	4.7	B
Up15	J	32	9.4	B
Dom Sufid	N	20	5	B
Gerdeh	J	60.6	28.9	B
CYPRESS	J	1.6	0.6	B
Lemont	J	1.1	0.2	B
Sereendan Kunin	J	16.9	3.4	B
SAI-BUI-BAO	J	2.6	0.4	B
Ziri	N	0.3	0	B
Khazar	J	1.1	0.2	B
Dacca6	N	8	1.5	B
Tainong67	J	30.9	12.8	B
Laoguangtou83	J	76.4	36.3	B
Weiguo	J	46.6	11.1	B
Liaogeng287	J	45.4	13	B
Zaoshunonghu6	J	25.2	9.2	B
Jindao1hao	J	49.6	11.5	B
Geng87-304	J	29.2	7.5	B
Sugeng2hao	J	6.5	1.7	B
Laohuzhong	J	78.7	33.4	B
Tieganwu	J	12.7	4.5	B
LimingB	J	33.8	9.5	B
Nipponbare	J	6	2.6	B
Eiko	J	71.3	32.1	B
	t-test	0.00821581	0.0185985
